# Supplementary material
Source: MDPI journal article supplement (https://www.mdpi.com/2073-4344/13/8/1217)
Supplement: s1 [file s1]

---

## Supporting Information

# Hard Template-Assisted Trans-Crystallization Synthesis of Hierarchically Porous Cu-SSZ-13 with Enhanced NH<sub>3</sub>-SCR Performance

Fuzhen Yang, Ying Xin \*, Xiaoli Zhu, Ahui Tang, Long Yu, Dongxu Han, Junxiu Jia, Yaning Lu and Zhaoliang Zhang

Shandong Provincial Key Laboratory of Fluorine Chemistry and Chemical Materials,  
School of Chemistry and Chemical Engineering, University of Jinan, Jinan 250022, China;  
17860733583@163.com (F.Y.); 18369838905@163.com (X.Z.); 202121100497@stu.ujn.edu.cn (A.T.);  
202221201247@stu.ujn.edu.cn (L.Y.); 17824030075@163.com (D.H.); jjxcca@163.com (J.J.);  
sdlyn1999@163.com (Y.L.); chm\_zhangzl@ujn.edu.cn (Z.Z.)

\* Correspondence: chm\_xiny@ujn.edu.cn; Tel.: +86-531-8973-6032

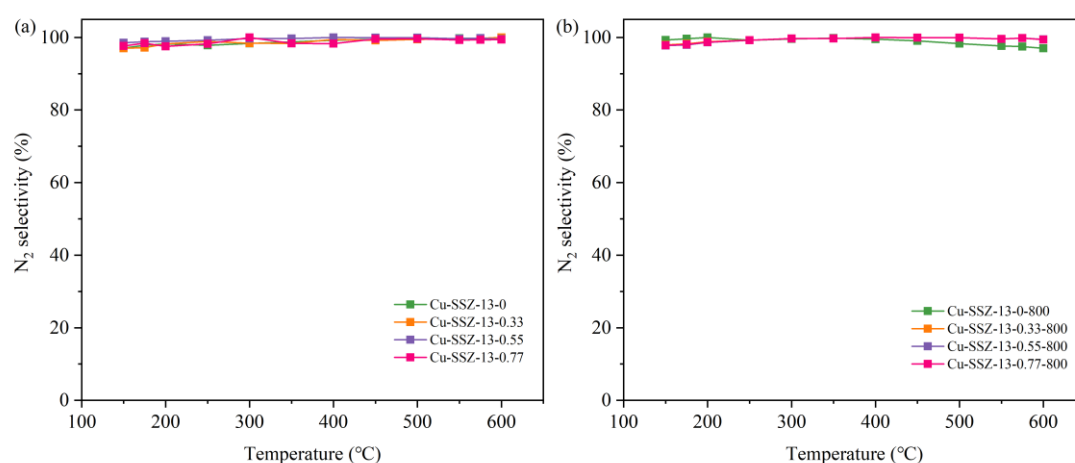

**Figure S1.** N<sub>2</sub> selectivity of (a) Cu-SSZ-13-*x* and (b) Cu-SSZ-13-*x*-800 catalysts.

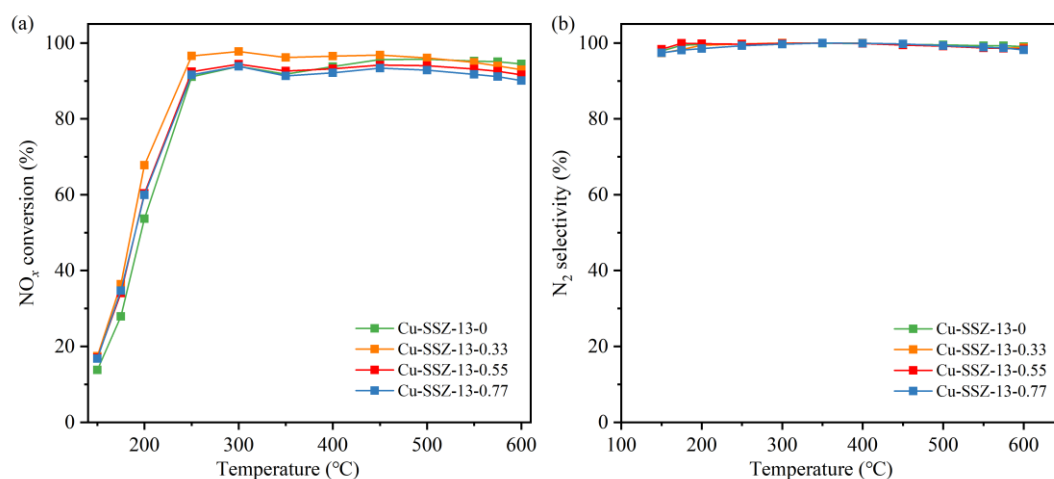

**Figure S2.** (a) NO<sub>x</sub> conversion and (b) N<sub>2</sub> selectivity of Cu-SSZ-13-*x* catalysts at a gas hourly space velocity of 800,000 h<sup>-1</sup>.

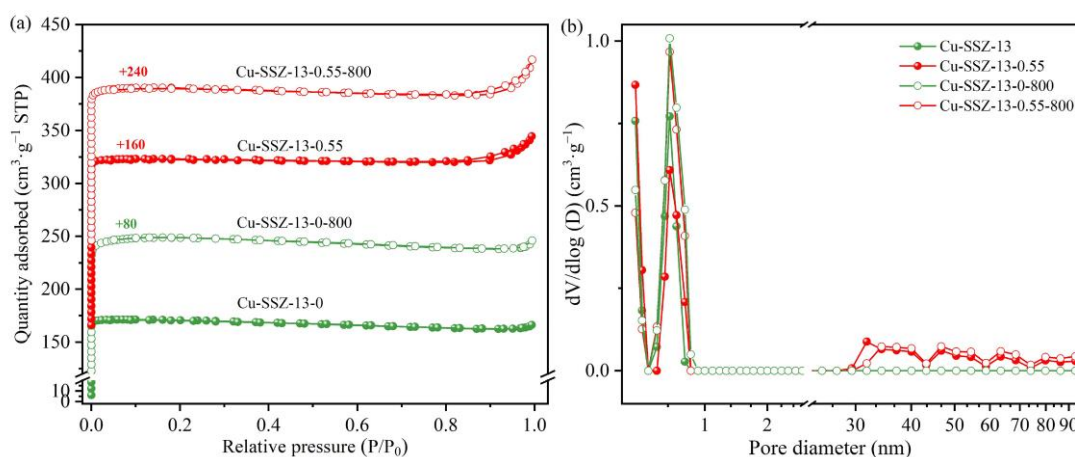

**Figure S3.** (a) N<sub>2</sub> adsorption/desorption isotherms and (b) pore size distribution curves of Cu-SSZ-13-0 and Cu-SSZ-13-0.55 catalysts before and after hydrothermal aging.

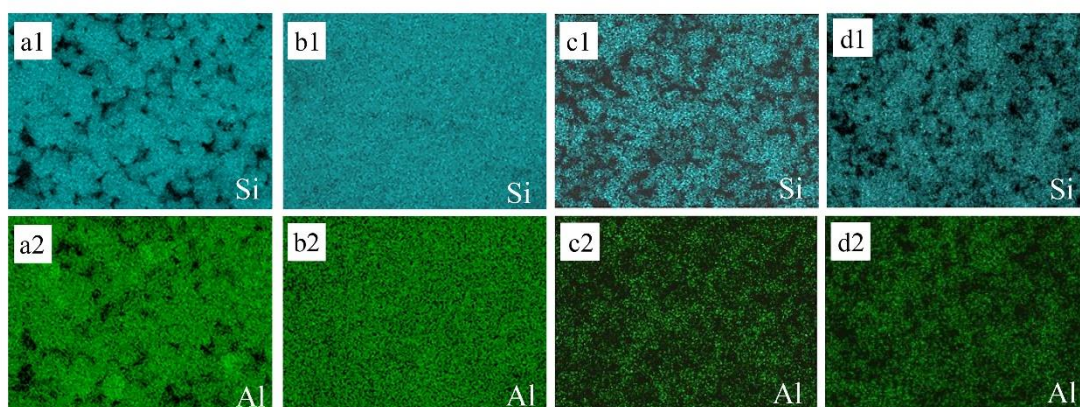

**Figure S4.** Si and Al elements EDS mappings of (a) Cu-SSZ-13-0, (b) Cu-SSZ-13-0.55, (c) Cu-SSZ-13-0-800, and (d) Cu-SSZ-13-0.55-800. (1) distribution of Si element and (2) distribution of Al element.

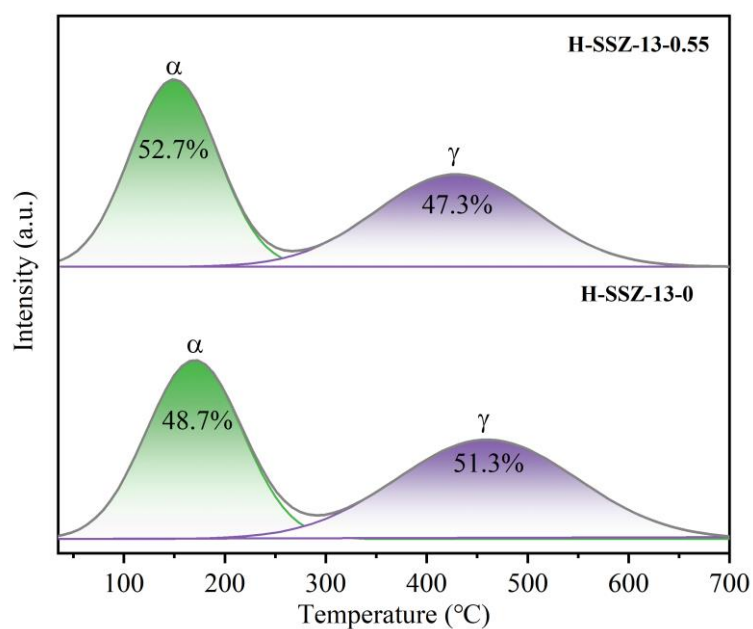

**Figure S5.** NH<sub>3</sub>-TPD curves of H-SSZ-13-0 and H-SSZ-13-0.55 zeolites.

**Table S1.** Quantification of NH<sub>3</sub>-TPD results for H-SSZ-13-0 and H-SSZ-13-0.55 zeolites.

| Sample        | NH <sub>3</sub> Desorption Amount (μmol·g <sup>-1</sup> ) |                |               |
|---------------|-----------------------------------------------------------|----------------|---------------|
|               | Weak Acidity                                              | Strong Acidity | Total Acidity |
| H-SSZ-13-0    | 703                                                       | 740            | 1443          |
| H-SSZ-13-0.55 | 931                                                       | 835            | 1766          |

**Table S2.** Kinetic catalytic performances of Cu-SSZ-13-0 and Cu-SSZ-13-0.55 catalysts before and after hydrothermal aging.

| Temperature (°C) | Cu-SSZ-13-0                    |                                                                        | Cu-SSZ-13-0.55                 |                                                                        | Cu-SSZ-13-0-800                |                                                                        | Cu-SSZ-13-0.55-800             |                                                                        |
|------------------|--------------------------------|------------------------------------------------------------------------|--------------------------------|------------------------------------------------------------------------|--------------------------------|------------------------------------------------------------------------|--------------------------------|------------------------------------------------------------------------|
|                  | NO <sub>x</sub> Conversion (%) | Reaction Rate×10 <sup>-8</sup> (mol·S <sup>-1</sup> ·g <sup>-1</sup> ) | NO <sub>x</sub> Conversion (%) | Reaction Rate×10 <sup>-8</sup> (mol·S <sup>-1</sup> ·g <sup>-1</sup> ) | NO <sub>x</sub> Conversion (%) | Reaction Rate×10 <sup>-8</sup> (mol·S <sup>-1</sup> ·g <sup>-1</sup> ) | NO <sub>x</sub> Conversion (%) | Reaction Rate×10 <sup>-8</sup> (mol·S <sup>-1</sup> ·g <sup>-1</sup> ) |
| 130              | 9.4                            | 58.22                                                                  | 7.4                            | 46.01                                                                  | -                              | -                                                                      | -                              | -                                                                      |
| 135              | 10.4                           | 63.88                                                                  | 8.9                            | 54.62                                                                  | 4.2                            | 22.13                                                                  | 4.2                            | 21.90                                                                  |
| 140              | 12.3                           | 74.44                                                                  | 11.7                           | 70.80                                                                  | 4.6                            | 24.09                                                                  | 4.6                            | 23.83                                                                  |
| 145              | 14.1                           | 84.75                                                                  | 13.4                           | 80.20                                                                  | 5.3                            | 27.09                                                                  | 5.7                            | 28.99                                                                  |
| 150              | 15.8                           | 93.59                                                                  | 15.5                           | 91.90                                                                  | 5.7                            | 28.95                                                                  | 6.8                            | 34.02                                                                  |
| 155              | 18.3                           | 107.08                                                                 | 17.6                           | 103.33                                                                 | 6.5                            | 32.90                                                                  | 7.6                            | 37.87                                                                  |
| 160              | 20.6                           | 119.05                                                                 | 20.8                           | 120.67                                                                 | 8.0                            | 39.95                                                                  | 8.7                            | 42.68                                                                  |
| 165              | -                              | -                                                                      | -                              | -                                                                      | 8.9                            | 43.69                                                                  | 10.2                           | 49.46                                                                  |
| 170              | -                              | -                                                                      | -                              | -                                                                      | 10.2                           | 49.42                                                                  | 12.3                           | 59.16                                                                  |
| 175              | -                              | -                                                                      | -                              | -                                                                      | 12.1                           | 58.10                                                                  | 14.6                           | 69.67                                                                  |
| 180              | -                              | -                                                                      | -                              | -                                                                      | 14.2                           | 67.60                                                                  | 17.4                           | 81.94                                                                  |
